# Supplementary material for: NOD2 drives early IL-33–dependent expansion of group 2 innate lymphoid cells during Crohn’s disease–like ileitis
Source: JCI journal article supplement (doi:10.1172/jci140624), 2021-01-14
Supplement: sd1 [file 1]

## Supplemental Information

### Extended Results and Discussion

To determine whether results from our animal studies showed translational relevance to the human setting, we analyzed whether ILC percentages, with specific interest in ILC2s, correlated in any way to carriage of known *NOD2* variants associated with susceptibility to CD. We focused on the three main coding mutations in *NOD2*, namely rs2066844 (single nucleotide polymorphism (SNP)8), rs2066845 (SNP12) and rs2066847 (SNP13)(1), and evaluated ILC frequency in peripheral blood of 41 patients with CD, 21 of whom were genotyped carriers of one or multiple *NOD2* SNPs (**Table S5**). Our results show that frequencies of total ILCs were not significantly different between carriers and non-carriers of all *NOD2* SNPs evaluated (**Fig. S2A**). Furthermore, no significant differences were observed in the percentages of any of the ILC subsets comparing CD-associated *NOD2* variant carriers with non-carriers (**Fig. S2B**); specifically, in our CD patient population, carriage of either one or more of the *NOD2* SNPs assayed (SNP8, SNP12, SNP13) did not alter the percentages any of the ILC subsets compared to those measured in non-carriers (**Fig. S2C**). Relevant to the present study, no direct effect of the *NOD2* SNPs was evident on the frequency of ILC2s (**Fig. S2D**). Taken together, these preliminary findings did not show any correlation(s) between carriage of CD-associated *NOD2/CARD15/IBD1* variants and total ILC frequency, as well as specific ILC subsets, including ILC2s, in our CD patient population evaluated.

These data, however, do not definitively rule out association between *NOD2/CARD15/IBD1* variants and the presence of ILC2s, specifically during the

development of early disease, as indicated in our animal studies. As such, it is possible that the impact of NOD2-sensing is critical at disease onset, and perhaps better exemplified in newly diagnosed, treatment naive CD patients. In addition, interrogation of a larger patient sample size, and perhaps studies comparing ILCs derived from the gut vs. systemic, circulating ILCs, as performed herein, are warranted and may reveal different results than obtained in the present study. Importantly, we show for the first time, using an established murine model of CD-like ileitis (*i.e.*, SAMP) that NOD2 has the ability to regulate ILC2 expansion and function during the early stages of chronic intestinal inflammation. Of note, using *Nod2*-deficient mice, Zhou *et al.* recently reported that selective activation of ILC3s is also dependent on NOD2-sensing of the gut microbiome by mucosal macrophages, which in turn, secrete IL-1 $\beta$  and induce ILC3s to produce IL-2 that promotes Treg function and ultimate protection from chronic inflammation(2). In the same study, reduced frequencies of both Tregs and IL-2-producing ILC3s were detected in mucosal biopsies from CD patients vs. healthy controls(2), although carriage of CD-associated *NOD2* variants and their potential impact on ILC3 frequency and/or function (*i.e.*, IL-2 production) were not assessed in their patient samples. As such, it is possible that NOD2 has simultaneous, yet opposing, effects on different ILC subsets (*i.e.*, pathogenic vs. protective) in the pathogenesis of CD. Taken together, emerging evidence supports the role of NOD2-dependent effects on ILC expansion and function that are important in both gut health and disease. Future studies are needed to uncover how these mechanism(s) can be harnessed to design effective strategies to treat chronic intestinal inflammation, such as that observed in IBD.

## Extended Methods

***In vivo* mouse studies.** All animal experiments were conducted in a blinded manner without prior knowledge of experimental groups by experimenter (KGB/CDS), with mice randomized to different interventions using progressive numeric labels, the code only known to the animal caretaker (HLH), and revealed at end of studies. Scientific rigor, data reproducibility and biological variables were followed based on recently published guidelines(3). Blockade of IL-33 was achieved using 4-wk-old SAMP treated for 6-wks with a murinized rat IgG1 Ab against mST2, with controls receiving an isotype IgG1 Ab (both from Amgen, Seattle, WA); for IL-33 administration experiments, 10-wk-old AKR and SAMP x *Nod2*<sup>-/-</sup> mice were injected with either murine rIL-33 (ALX-522-101; Enzo Life Sciences, Farmingdale, NY) or PBS (vehicle control), as previously described(4). For NOD2 activation studies, 10-wk-old GF-SAMP were treated i.p. for 3d with either muramyl dipeptide (L18-MDP, 100ug/mouse) or endotoxin-free water (vehicle control), both from InvivoGen, San Diego, CA, as previously reported(5).

**Tissue harvest, stereomicroscopy (SM)-assisted microdissection, and histologic assessment.** Mice were euthanized and ileal tissues harvested and processed for either histology, SM, qPCR, or lymphocyte isolation, as previously described(4,6,7). MLNs were collected and single-cell suspensions prepared for either flow cytometry or *ex vivo* functional assays(4,6,8). Ileal inflammation was histologically evaluated by a GI pathologist in a blinded-fashion using an established scoring system(4,6). 3D-SM Assessment and Pattern Profiling (3D-SMAPgut) was used to map and quantify extent of mucosal disease in SAMPx*Nod2*<sup>-/-</sup> vs. WT ilea, with SM-assisted punch biopsy-microdissection of involved and non-involved areas performed as previously

reported(7), with resulting tissues harvested for detection of IL-33 by qPCR and Western blotting.

**Patient samples.** Intestinal (colonic/ileal) mucosal biopsies were collected from adult patients with confirmed diagnosis of CD and from healthy controls, included upon negative endoscopic findings during polyp screen. Additional biopsies were taken from resected specimens of patients undergoing hemicolectomy for either stricturing CD to obtain inflamed/non-inflamed ileal tissues or colorectal cancer to obtain non-inflamed healthy control tissues from margins (**Table S2, S3 and S5**). Specifically, six mucosal biopsies were taken from macroscopically involved lesions in CD patients. In healthy individuals, colonic biopsies were taken randomly, mainly from the splenic flexure. Biopsies were collected in sterile RPMI 1640 medium (Lonza Bioscience, Basel, Switzerland) and stored at 4°C until processing (within 1h).

Combined biopsies were subsequently washed in RPMI supplemented with HEPES (Lonza Bioscience), 10% FBS and 2% antibiotic-antimycotic (both ThermoFisher, Waltham, MA). Epithelium was removed by incubation in RPMI-supplemented with EDTA (Lonza Bioscience), DTT (Chem Lab, Zedelgem, Belgium) and HEPES at 37 °C on a magnetic stirrer at 400 rpm for 20min. Resulting tissues were transferred to 5 mL HBSS with calcium and magnesium (Lonza Bioscience) supplemented with HEPES, FBS, 5.0mg collagenase IV (Worthington Biochemical Corp., Lakewood, NJ) and 10 µl DNase I (Roche, Penzburg, Germany) at 37 °C on a magnetic stirrer at 400 rpm for 40min. Cell suspensions were strained through 70µm filters (EASYstrainer™, Greiner Bio-One, Monroe, NC), quenched with 5 ml PBS with 2.5% BSA, and centrifuged at 400g for 5min. Remaining undigested tissues were again

resuspended in 5 mL HBSS supplemented with HEPES, FBS, 5.0 mg collagenase and 10µl DNase I at 37 °C on a magnetic stirrer at 400 rpm for 20 min.

**Flow cytometry.** Single-cell suspensions of MLN- and ileal lamina propria-derived lymphocytes were isolated from experimental mice and either assayed immediately or prepared for *ex vivo* stimulation experiments, as described before(4,6,8) and using the Lamina Propria Dissociation Kit (Miltenyi Biotec, Waltham, MA) according to manufacturer's instructions, respectively. For cell-surface staining,  $2 \times 10^6$  cells were incubated with fixable live/dead cell dye in violet or aqua (ThermoFisher), Fc-receptors blocked with anti-CD16/CD32 (eBioscience, San Diego, CA), and stained for 30min at 4°C with indicated antibodies (**Table S4**). For intracellular staining, cells were fixed in Fix/Perm and Permeabilization Buffers (eBioscience) for 30min each at 4°C and RT, respectively, in presence of indicated antibodies (**Table S4**). Absolute numbers of gut mucosal cells were calculated using CountBright™ Absolute Counting Beads (Invitrogen, Carlsbad, CA). For compensation, flow minus one controls and single stained beads from AbC Total Antibody Compensation Bead Kit (Invitrogen) were used. Total ILCs and ILC subsets in experimental mice were identified using standard gating strategies (**Figure 1A,D**).

For ILC2 functional assays, single cell suspensions were isolated as described above and incubated *ex vivo* ( $2 \times 10^6$  cells/well) in the presence of BD GolgiPlug Protein Transport Inhibitor (containing Brefeldin A) with/without Leukocyte Activation Cocktail (containing PMA/ionomycin) for 5h at 37°C in 5%CO<sub>2</sub>, according to manufacturer's instructions (Becton Dickinson, San Jose, CA). Cells were then stained for cell-surface

markers and intracellular IL-5, as described above. Cells/data were acquired on FACS Aria or LSR II instruments, and analyzed with FlowJo Software (all Becton Dickinson).

For human studies, viability of isolated leukocytes derived from gut mucosal biopsies (**Tables S2, S3 and S5**) was determined with Fixable Viability Dye (FVD780, Biolegend, San Diego, CA), and intestinal leukocytes ( $4 \times 10^6$ ) were stained with indicated Abs (**Table S4**) in 100  $\mu$ l PBS/BSA supplemented with human serum and Brilliant Stain Buffer (563794, Becton Dickinson), and fixed for 10min in 0.5% PFA. Cells were resuspended in PBS/BSA/EDTA and stored at 4°C in dark until acquisition on an LSR Fortessa instrument, with calibration performed by CS&T beads (all from Becton Dickinson). For compensation controls, single color UltraComp eBeads™ (ThermoFisher) were used, and Fluorescence Minus One (FMO) controls included. Total ILCs are defined as Lin<sup>-</sup>CD161<sup>+</sup>CD127<sup>+</sup> cells within live CD45<sup>+</sup> population. Among total ILCs, ILC2s were further identified as CRTH2<sup>+</sup> (CD294<sup>+</sup>), NCR<sup>-</sup>ILC3s as CRTH2<sup>-</sup>CD117<sup>+</sup>NKp44<sup>-</sup>/CD336<sup>-</sup>, NCR<sup>+</sup>ILC3s as CRTH2<sup>-</sup>CD117<sup>+</sup>NKp44<sup>+</sup>, and ILC1s as CRTH2<sup>-</sup>CD117<sup>-</sup>NKp44<sup>-</sup> (**Figure 4A**).

**Genotyping for *NOD2* variants.** DNA was extracted from peripheral blood leukocytes and genotyping performed as previously described(9). Briefly, CD patients and healthy controls (**Table S5**) were evaluated for carriage of the three main CD-associated *NOD2* variants p.Arg702Trp (rs2066844), p.Gly908Arg (rs2066845) and p.Gly908Arg (rs2066847)(1); haplotype and genotype-phenotype (ILC frequency) analyses were subsequently performed.

136 **Statistics.** Data included in Supplemental Information were analyzed using GraphPad  
137 Prism 5 (GraphPad Software, La Jolla, CA). Selection of appropriate statistical tests  
138 was based on variance and underlying distribution of data. Global effects between  
139 groups were first assessed using one-way ANOVA with Bonferroni correction for  
140 multiple comparisons. Differences between individual groups were directly compared as  
141 indicated in each supplemental figure legend, with  $P \leq 0.05$  considered significant.

## References

1. Hampe J, et al. Association of NOD2 (CARD 15) genotype with clinical course of Crohn's disease: a cohort study. *Lancet*. 2002;359(9318):1661-5.
2. Zhou L, et al. Innate lymphoid cells support regulatory T cells in the intestine through interleukin-2. *Nature*. 2019;568(7752):405-9.
3. Arseneau KO, Cominelli F. Improving the reproducibility and quality of reporting for animal studies in inflammatory bowel disease. *Inflamm Bowel Dis*. 2017;23(12):2069-71.
4. De Salvo C, et al. IL-33 drives eosinophil infiltration and pathogenic type 2 helper T-cell immune responses leading chronic experimental ileitis. *Am J Pathol*. 2016;186(4):885-98.
5. Corridoni D, et al. Dysregulated NOD2 predisposes SAMP1/YitFc mice to chronic intestinal inflammation. *Proc Natl Acad Sci USA*. 2013;110(42):16999-7004.
6. Pastorelli L, et al. Epithelial-derived IL-33 and its receptor ST2 are dysregulated in ulcerative colitis and in experimental Th1/Th2 driven enteritis. *Proc Natl Acad Sci USA*. 2010;107(17):8017-22.
7. Rodriguez-Palacios A, et al. Stereomicroscopic 3D-pattern profiling of murine and human intestinal inflammation reveals unique structural phenotypes. *Nat Commun*. 2015;6:7577.
8. Sonnenberg GF, Monticelli LA, Elloso MM, Fouser LA, Artis D. CD4(+) lymphoid tissue-inducer cells promote innate immunity in the gut. *Immunity*. 2011;34(1):122-34.

- 164 9. Vancamelbeke M, et al. Genetic and transcriptomic bases of intestinal epithelial  
165 barrier dysfunction in inflammatory bowel disease. *Inflamm Bowel Dis*.  
166 2017;23(10):1718-29.
- 167 10. Takayama T, et al. Imbalance of NKp44(+)NKp46(-) and NKp44(-)NKp46(+) natural  
168 killer cells in the intestinal mucosa of patients with Crohn's disease. *Gastroenterol*.  
169 2010;139(3):882-92.
- 170 11. Geremia A, et al. IL-23-responsive innate lymphoid cells are increased in  
171 inflammatory bowel disease. *J Exp Med*. 2011;208(6):1127-33.
- 172 12. Bernink JH, et al. Human type 1 innate lymphoid cells accumulate in inflamed  
173 mucosal tissues. *Nat Immunol*. 2013;14(3):221-9.
- 174 13. Fuchs A, et al. Intraepithelial type 1 innate lymphoid cells are a unique subset of IL-  
175 12- and IL-15-responsive IFN- $\gamma$ -producing cells. *Immunity*. 2013;38(4):769-81.
- 176 14. Longman RS, et al. CX<sub>3</sub>CR1<sup>+</sup> mononuclear phagocytes support colitis-associated  
177 innate lymphoid cell production of IL-22. *J Exp Med*. 2014;211(8):1571-83.
- 178 15. Mizuno S, et al. Cross-talk between ROR $\gamma$ t<sup>+</sup> innate lymphoid cells and intestinal  
179 macrophages induces mucosal IL-22 production in Crohn's disease. *Inflamm Bowel*  
180 *Dis*. 2014;20(8):1425-34.
- 181 16. Bernink JH, et al. Interleukin-12 and -23 control plasticity of CD127(+) group 1 and  
182 group 3 innate lymphoid cells in the intestinal lamina propria. *Immunity*.  
183 2015;43(1):146-60.
- 184 17. Hepworth MR, et al. Immune tolerance. Group 3 innate lymphoid cells mediate  
185 intestinal selection of commensal bacteria-specific CD4<sup>+</sup> T cells. *Science*.  
186 2015;348(6238):1031-5.

- 187 18. Lim AI, et al. IL-12 drives functional plasticity of human group 2 innate lymphoid  
188 cells. *J Exp Med*. 2016;213(4):569-83.
- 189 19. Li J, Doty AL, Iqbal A, Glover SC. The differential frequency of Lineage(-)CRTH2(-  
190 )CD45(+)NKp44(-)CD117(-)CD127(+) ILC subset in the inflamed terminal ileum of  
191 patients with Crohn's disease. *Cell Immunol*. 2016;304-305:63-8.
- 192 20. Li J, et al. Enrichment of IL-17A<sup>+</sup>IFN- $\gamma$ <sup>+</sup> and IL-22<sup>+</sup> T cell subsets is associated with  
193 reduction of NKp44<sup>+</sup> ILC3s in the terminal ileum of Crohn's disease patients. *Clin*  
194 *Exp Immunol*. 190(1):143-53.
- 195 21. Forkel M, et al. Distinct alterations in the composition of mucosal innate lymphoid  
196 cells in newly diagnosed and established Crohn's disease and ulcerative colitis. *J*  
197 *Crohns Colitis*. 2019;13(1):67-78.

## Supplemental Figure Legends

### **Figure S1. Group 2 ILCs remain the predominant ILC subset as ileitis progresses**

**into established disease in SAMP mice.** **A)** Representative H&E-stained histologic images of ilea from 4-, 10- and 20-wk-old AKR (parental control) mice depict development of healthy ileal tissues with formation of normal crypt-villous structures and minimal baseline levels of inflammatory cells (*upper row*). In contrast, while 4-wk-old SAMP (similar to age-matched AKR) show no histologic evidence of inflammation (*lower left*), infiltration of inflammatory cells within the lamina propria with expansion and flattening of villi, and hypertrophy of muscular layers begins to manifest at 10-wks (*lower middle*). At 20-wks, frank villous blunting with dramatic changes in crypt-villous architecture becomes apparent, with marked presence of goblet cells and severe inflammation (crypt abscess with encased neutrophils noted in center of field, *lower right*), characteristic of SAMP (scale bar=100 $\mu$ m). **B)** Time course of ileal disease severity in SAMP vs. AKR ( $n=10-13$ ). **C)** Although total ILC frequency within live CD45<sup>+</sup> population remains stable as ileitis is established and adaptive immune cells expand at 20-wks in SAMP (**Fig. 1A**), increased ILC2 percentages persist (*left*) and absolute numbers significantly rise (*right*) compared to age-matched AKR ( $n=5$ ). **D)** Representative H&E-stained histologic images of ilea from WT SAMP (SAMPxRag2<sup>+/+</sup>, *upper row*) compared to SAMP lacking T/B-lymphocytes, but with intact innate immune function (SAMPxRag2<sup>-/-</sup>, *lower row*), at 4-, 10- and 20-wks of age. While SAMPxRag2<sup>+/+</sup> develop ileitis over a similar time course to native SAMP (**A,B**), SAMPxRag2<sup>-/-</sup> show marked, active inflammation at 10-wks, with similar severity to WT SAMP (**Figure 1F**), which persists at 20-wks, but is dramatically reduced compared to WT and native SAMP

(scale bar=100 $\mu$ m). \*\* $P\leq 0.01$ , \*\*\* $P\leq 0.001$ , \*\*\*\* $P\leq 0.001$ , and (#### $P\leq 0.001$  vs. 4-wk-old SAMP) by two-tailed unpaired Student's *t*-test; experiments performed at least in duplicate.

**Figure S2. Association of NOD2 variants and ILC frequencies in Crohn's disease.**

**A)** Frequency of total ILCs (Lin<sup>-</sup>CD161<sup>+</sup>CD127<sup>+</sup>) within live CD45<sup>+</sup> population in CD patients who are carriers of one or more allele variants for either SNP8, SNP12 or SNP13 compared to non-carriers. **B)** Percentages of (●)ILC1s (CD294<sup>-</sup>CD117<sup>-</sup>CD336<sup>-</sup>), (●)ILC2s (CD294<sup>+</sup>), and (●)ILC3s (CD294<sup>-</sup>CD117<sup>+</sup>CD336<sup>-</sup>) of total ILCs comparing carriers ( $\geq 1$  SNP) vs. non-carriers, and **C)** broken down by number of affected regions (SNP8-12-13). **D)** Frequency of ILC2s comparing carriers vs. non-carriers of *NOD2* variant rs2066844 (SNP8), rs2066845 (SNP12), and rs2066847 (SNP13) in CD patients. Data presented as box plots (25<sup>th</sup>, 50<sup>th</sup>, 75<sup>th</sup> quantiles shown); *N*=41. No significant differences were observed between carriers ( $\geq 1$ ) and non-carriers (0) of *NOD2* variants by unpaired nonparametric Mann-Whitney test, and among carriers of 0-1-2-3 SNPs by one-way ANOVA with Bonferroni correction.

236 **Table S1.** *Human studies supporting contribution of ILCs to the pathogenesis of IBD.*

| Patients | Study design                                                                                                       | ILC1 | ILC2 | ILC3 | Summary                                                                                                                                                                                                                                                                                              | Ref. |
|----------|--------------------------------------------------------------------------------------------------------------------|------|------|------|------------------------------------------------------------------------------------------------------------------------------------------------------------------------------------------------------------------------------------------------------------------------------------------------------|------|
| IBD      | Surgically-resected colons from moderate-to-severe CD, UC and unaffected areas of colon cancer (control)           | -    | -    | ↑    | Imbalance of NKp44 <sup>+</sup> /NKp46 <sup>+</sup> cells in CD, with ↑IFN $\gamma$ -producing NKp46 <sup>+</sup> cells vs. control                                                                                                                                                                  | 10   |
| IBD      | Blood from CD, UC, surgically-resected ilea/colons and mucosal biopsies from CD and healthy areas of CRC (control) | ↑    | -    | -    | ↑IL-17 <sup>+</sup> IFN $\gamma$ <sup>+</sup> IL-23-responding CD56 <sup>+</sup> ILCs in gut, but not peripheral blood, of CD vs. UC and control                                                                                                                                                     | 11   |
| CD       | Surgically-resected inflamed ilea from CD and from unaffected ilea from colon cancer (non-inflamed control)        | ↑    | -    | ↓    | ↑IFN $\gamma$ -expressing ILC1s and ↓NKp44 <sup>+</sup> ILC3s in active CD vs. control                                                                                                                                                                                                               | 12   |
| CD       | Surgically-resected non-inflamed colons and small intestines from CD and non-IBD patients (control)                | ↑    | -    | -    | ↑intraepithelial IFN $\gamma$ /CCL4-producing NKp44 <sup>+</sup> CD103 <sup>+</sup> ILC1s in CD vs. non-IBD control                                                                                                                                                                                  | 13   |
| IBD      | Biopsies from descending colon of mild-to-moderate CD, UC and non-IBD undergoing routine screening (control)       | -    | -    | ↑    | ↑protective IL-22-producing ILC3s in CD and UC vs. control, regulated by IL-23/IL-1 $\beta$ /TL1A-producing CX <sub>3</sub> CR1 <sup>+</sup> MNPs                                                                                                                                                    | 14   |
| CD       | Surgically-resected affected and unaffected (control) intestines from moderate-to-severe CD                        | -    | -    | NC   | No change in percentages ROR $\gamma$ t <sup>+</sup> CD127 <sup>+</sup> CD56 <sup>+</sup> /CD56 <sup>+</sup> ILC3s in inflamed vs. non-inflamed CD, but ↑IL-22 from these cells in non-inflamed CD when co-cultured with inflammatory macrophages                                                    | 15   |
| CD       | Surgically-resected inflamed ilea from CD and unaffected ilea from colon cancer (non-inflamed control)             | ↑    | -    | ↓    | ↑IFN $\gamma$ -producing CD127 <sup>+</sup> ILC1s at cost of IL-22-producing NKp44 <sup>+</sup> ILC3s in CD vs. control, which is reversible in presence of IL-2, IL-23, and IL-1 $\beta$ that is dependent on ROR $\gamma$ t and enhanced by RA; plasticity also dependent on CD14 <sup>+</sup> DCs | 16   |
| CD       | Intestinal biopsies from right and left colons of pediatric CD and non-IBD patients (control)                      | -    | -    | NC   | ↓MHCII on colonic ILC3s (but no change in ILC3 frequency) in CD vs. non-IBD associates with elevated commensal bacteria-specific inflammatory responses                                                                                                                                              | 17   |
| CD       | Ileocecal resections from refractory CD compared to peripheral blood from healthy donors (control)                 | -    | ↑    | -    | ↑IL-13 <sup>+</sup> ILC2s that co-express IFN $\gamma$ in CD gut vs. peripheral blood (not gut-derived, however) from normal donors, suggesting plasticity of ILC2s in context of IBD                                                                                                                | 18   |
| CD       | Surgically-resected terminal ilea from CD patients (various degree of inflammation)                                | ↑    | -    | ↓    | ↑Lin <sup>-</sup> CRTH2 <sup>-</sup> CD45 <sup>+</sup> NKp44 <sup>-</sup> CD117 <sup>+</sup> CD127 <sup>+</sup> and ↓Lin <sup>-</sup> CRTH2 <sup>-</sup> CD45 <sup>+</sup> NKp44 <sup>+</sup> CD117 <sup>+</sup> CD127 <sup>+</sup> ILCs with                                                        | 19   |

|     |                                                                                                                                                                                  |    |   |   |                                                                                                                                                                                                                                                                                                                    |    |
|-----|----------------------------------------------------------------------------------------------------------------------------------------------------------------------------------|----|---|---|--------------------------------------------------------------------------------------------------------------------------------------------------------------------------------------------------------------------------------------------------------------------------------------------------------------------|----|
|     |                                                                                                                                                                                  |    |   |   | increased CD severity that is reversible after ustekinumab (anti-IL-12/IL-23) treatment                                                                                                                                                                                                                            |    |
| CD  | Surgically-resected inflamed and unaffected areas from terminal ilea of CD patients who failed medical treatment                                                                 | ↑  | - | ↓ | ↑NKp44 <sup>+</sup> CD117 <sup>-</sup> ILC1s and ↓(HLA-DR) NKp44 <sup>+</sup> ILC3s associated with ↑pathogenic IL-17A <sup>+</sup> IFN $\gamma$ <sup>+</sup> and IL-22 <sup>+</sup> IFN $\gamma$ <sup>+</sup> T cell subsets                                                                                      | 20 |
| IBD | Blood and inflamed/non-inflamed ileal/colonic biopsies from newly diagnosed and $\geq 1$ y CD, UC and patients undergoing tumor screening found to be negative (non-IBD control) | ↑  | ↑ | ↓ | ↓NKp44 <sup>+</sup> ILC3s and ↑ILC1s, ILC2s and NKp44 <sup>+</sup> ILC3s correlates with ↑IBD severity. ↑ILC1s and ↑ILC2s in newly diagnosed CD and UC, respectively, with both ↑ILC1s and ILC2s in established IBD. No change in circulating ILC frequency after vedolizumab (anti- $\alpha 4\beta 7$ ) treatment | 21 |
| CD  | Surgically-resected inflamed/non-inflamed small intestines from CD and ileal biopsies from pediatric CD and non-IBD controls                                                     | -  | - | ↓ | IL-1 $\beta$ -ILC3-IL-2 circuit essential for Treg maintenance and small intestinal homeostasis. ↓IL-2 <sup>+</sup> ILC3s correlates with ↓Treg frequency in CD                                                                                                                                                    | 2  |
| IBD | Blood at baseline and at weeks 0, 4, 8, 14/24 after biological therapy; colonic biopsies at baseline from edge of inflamed ulcers and from sigmoid of healthy controls           | ↓  |   | ↑ | Intestinal, but not circulating, ILCs are impacted by biological therapy. ↑NKp44 <sup>+</sup> ILC3s and ↓ILC1 after biological therapy as collateral effect of intestinal healing                                                                                                                                  | 22 |
| IBD | Blood and/or colonic tissues from pediatric and adult subjects with active disease                                                                                               | ↓↑ |   | ↓ | ↓ILC1s in blood of CD, but ↑ in mucosa of CD>UC. ↓ILC3s in UC mucosa                                                                                                                                                                                                                                               | 23 |

**Abbreviations:** **CD**, Crohn's disease; **CRC**, colorectal cancer; **CRTH2**, chemoattractant receptor-homologous molecule expressed on Th2 cells; **IBD**, inflammatory bowel disease; **ILC**, innate lymphoid cells; **ILC1-3**, group 1-3 innate lymphoid cells; **Lin<sup>-</sup>**, lineage negative; **MNPs**, mononuclear phagocytes; **NC**, no change; **RA**, retinoic acid; **ROR $\gamma$ t**, retinoic acid receptor-related orphan receptor- $\gamma$ t; **TL1A**, TNF-like factor 1A; **UC**, ulcerative colitis

240

**Table S2.** *Demographics of CD patients (active) and healthy controls.*

|                                                  | <b>CD</b>          | <b>HC</b>         |
|--------------------------------------------------|--------------------|-------------------|
| <b>Number of patients (N)</b>                    | 56                 | 24                |
| <b>Sex</b> , women, <i>n</i> (%)                 | 29 (51.8%)         | 14 (58.3%)        |
| <b>Age</b> (yrs), mean ( $\pm$ SEM)              | 40.0 ( $\pm$ 2.3)  | 57.8 ( $\pm$ 2.8) |
| <b>Disease duration</b> (yrs), mean ( $\pm$ SEM) | 14.06 ( $\pm$ 1.5) | -                 |
| <b>Disease location</b> , <i>n</i> (%)           |                    |                   |
| Ileal (L1)                                       | 17 (30.4%)         | 6 (25%)           |
| Colonic (L2)                                     | 11 (19.6%)         | 18 (75%)          |
| Ileocolonic (L3)                                 | 27 (48.2%)         | -                 |
| NA                                               | 1 (0.02%)          | -                 |

241

**Abbreviations:** **CD**, Crohn's disease; **HC**, healthy controls; **NA**, no answer

242

**Table S3.** *Demographics of ileal-specific CD patients (matched samples).*

|                                                                  | <b>CD</b>         |
|------------------------------------------------------------------|-------------------|
| <b>Number of patients</b> ( <i>N</i> )                           | 10                |
| <b>Sex</b> , women, <i>n</i> (%)                                 | 5 (50.0%)         |
| <b>Age</b> (yrs), mean ( $\pm$ SEM)                              | 53.6 ( $\pm$ 3.9) |
| <b>Disease duration</b> (yrs), mean ( $\pm$ SEM)                 | 20.4 ( $\pm$ 4.6) |
| <b>Medications</b> (at time of tissue procurement), <i>n</i> (%) |                   |
| Steroids                                                         | 1 (10.0%)         |
| Anti-TNF (Adalimumab, IFX)                                       | 2 (20.0%)         |
| Ustekinumab                                                      | 2(20.0%)          |
| Vedolizumab                                                      | 1 (10.0%)         |
| MTX                                                              | 1(10.0%)          |
| None                                                             | 3 (30.0%)         |

243

**Abbreviations:** **CD**, Crohn's disease; **IFX**, Infliximab; **MTX**, methotrexate

244 **Table S4.** *Antibodies utilized for flow cytometry.*

| Antibody (raised against)    |         | Label      | Clone/<br>Catalog # | Source                               |
|------------------------------|---------|------------|---------------------|--------------------------------------|
| Antigen                      | Species |            |                     |                                      |
| CD45                         | mouse   | PerCP      | 30-F11              | eBioscience, San Diego CA            |
| CD127                        | mouse   | eFluor480  | A7R34               | eBioscience                          |
| ST2/IL-33R                   | mouse   | FITC       | DJ8                 | mdBiosciences, Zurich<br>Switzerland |
| Lineage markers <sup>A</sup> | mouse   | FITC       | # 133301            | Biolegend, San Diego, CA             |
| Lineage markers <sup>B</sup> | mouse   | eFluor450  | # 133313            | Biolegend                            |
| T-bet                        | mouse   | PE-Cy7     | 4B10                | eBioscience                          |
| GATA3                        | mouse   | PE         | TWAJ                | eBioscience                          |
| ROR $\gamma$ t               | mouse   | APC        | AFKJS-9             | eBioscience                          |
| IL-5                         | mouse   | BV 421     | TRFK5               | Biolegend                            |
| CD11c                        | human   | FITC       | 3.9                 | ThermoFisher, Waltham, MA            |
| CD123                        | human   | FITC       | 6H6                 | ThermoFisher                         |
| CD14                         | human   | FITC       | 61D3                | ThermoFisher                         |
| CD19                         | human   | FITC       | H1B19               | ThermoFisher                         |
| CD1a                         | human   | FITC       | HI149               | ThermoFisher                         |
| CD3                          | human   | FITC       | UCHT1               | ThermoFisher                         |
| CD303a                       | human   | FITC       | 201A                | ThermoFisher                         |
| CD94                         | human   | FITC       | DX22                | ThermoFisher                         |
| Fc $\epsilon$ R1 $\alpha$    | human   | FITC       | AER-37 (CRA1)       | ThermoFisher                         |
| TCR $\alpha/\beta$           | human   | FITC       | IP26                | ThermoFisher                         |
| TCR $\gamma/\delta$          | human   | FITC       | B1.1                | ThermoFisher                         |
| CD34                         | human   | FITC       | 4H11                | ThermoFisher                         |
| CD45                         | human   | AF 700     | 2D1                 | ThermoFisher                         |
| CD161                        | human   | PE-Cy7     | HP-3G10             | ThermoFisher                         |
| CD117                        | human   | BV 421     | YB5.B8 (RUO)        | BD Biosciences,<br>San Jose, CA      |
| CD127                        | human   | BV 711     | A019D5              | Biolegend                            |
| CD294                        | human   | AF 647     | BM16                | Biolegend                            |
| CD336                        | human   | PE         | P44-8               | Biolegend                            |
| CD4                          | human   | eVolve 605 | SK3                 | ThermoFisher                         |

245 **Abbreviations:** **AF**, Alexa Fluor; **APC**, allophycocyanin; **BV**, brilliant violet; **GATA3**, GATA binding  
 246 protein-3; **PerCP**, peridinin-chlorophyll-protein; **PE/PE-Cy7**, R-phycoerythrin (coupled to cyanin dye);  
 247 **ROR $\gamma$ t**, retinoic acid receptor-related-orphan-receptor-gamma t; **T-bet**, T-box expressed in T cells)

248 <sup>A</sup>**CD3e** (145-2C11), **Ly-6G/Ly-6C** (RB6-8C5), **CD11b** (M1/70), **CD45R/B220** (RA3-6B2), **TER-**  
 249 **119/Erythroid cells** (Ter-119); <sup>B</sup>**CD3** (17A2), **Ly-6G/Ly-6C** (RB6-8C5), **CD11b** (M1/70), **CD45R/B220**  
 250 (RA3-6B2), **TER-119/Erythroid cells** (Ter-119)  
 251

252

**Table S5.** *Demographics of CD patients (NOD2 variant non-carriers vs. carriers).*

|                                        | <b>Non-carriers<br/>(0)</b> | <b>Carriers<br/>(≥1)</b> |
|----------------------------------------|-----------------------------|--------------------------|
| <b>Number of patients (N)</b>          | 20                          | 21                       |
| <b>Sex</b> , women, <i>n</i> (%)       | 13 (65.0%)                  | 13 (61.9%)               |
| <b>Age</b> (yrs), mean (±SEM)          | 45.1 (±3.8)                 | 46.42 (±2.5)             |
| <b>Disease location</b> , <i>n</i> (%) |                             | -                        |
| Ileal (L1)                             | 9 (45.0%)                   | 7(33.3%)                 |
| Colonic (L2)                           | 1 (5.0%)                    | 4(19.0%)                 |
| Ileocolonic (L3)                       | 10 (50.0%)                  | 10(47.6%)                |

253

**Abbreviations:** **CD**, Crohn's disease; **HC**, healthy controls

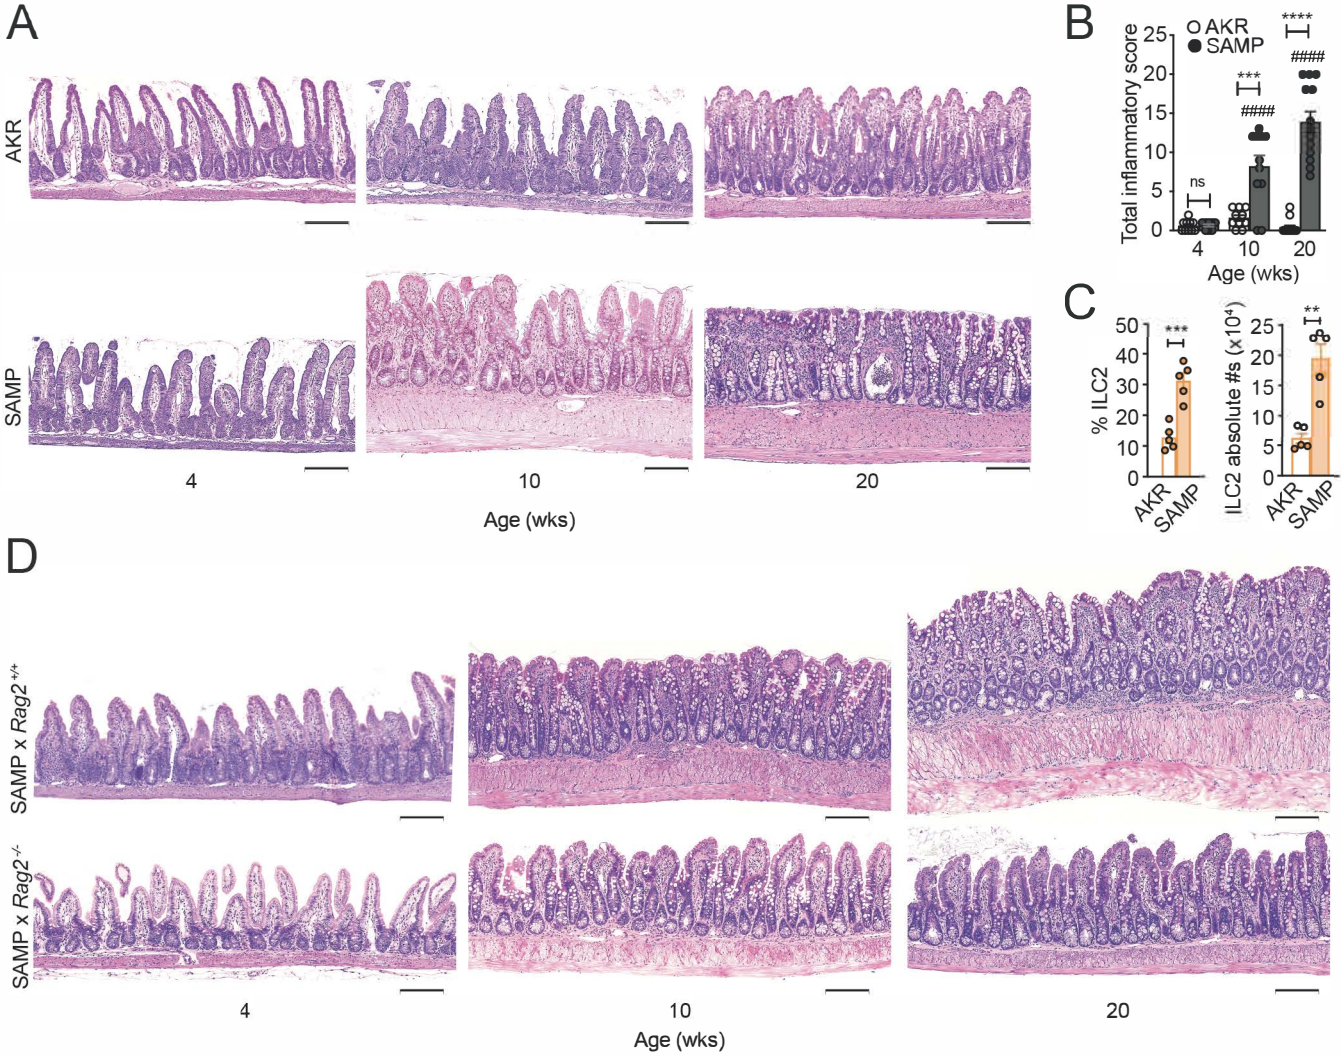

**Figure S1. Group 2 ILCs remain the predominant ILC subset as ileitis progresses into established disease in SAMP mice.** **A)** Representative H&E-stained histologic images of ilea from 4-, 10- and 20-wk-old AKR (parental control) mice depict development of healthy ileal tissues with formation of normal crypt-villous structures and minimal baseline levels of inflammatory cells (*upper row*). In contrast, while 4-wk-old SAMP (similar to age-matched AKR) show no histologic evidence of inflammation (*lower left*), infiltration of inflammatory cells within the lamina propria with expansion and flattening of villi, and hypertrophy of muscular layers begins to manifest at 10-wks (*lower middle*). At 20-wks, frank villous blunting with dramatic changes in crypt-villous architecture becomes apparent, with marked presence of goblet cells and severe inflammation (crypt abscess with encased neutrophils noted in center of field, *lower right*), characteristic of SAMP (scale bar=100 $\mu$ m). **B)** Time course of ileal disease severity in SAMP vs. AKR ( $n=10-13$ ). **C)** Although total ILC frequency within live CD45<sup>+</sup> population remains stable as ileitis is established and adaptive immune cells expand at 20-wks in SAMP (**Fig. 1A**), increased ILC2 percentages persist (*left*) and absolute numbers significantly rise (*right*) compared to age-matched AKR ( $n=5$ ). **D)** Representative H&E-stained histologic images of ilea from WT SAMP (SAMPx Rag2<sup>+/+</sup>, *upper row*) compared to SAMP lacking T/B-lymphocytes, but with intact innate immune function (SAMPxRag2<sup>-/-</sup>, *lower row*), at 4-, 10- and 20-wks of age. While SAMPxRag2<sup>+/+</sup> develop ileitis over a similar time course to native SAMP (**A,B**), SAMPxRag2<sup>-/-</sup> show marked, active inflammation at 10-wks, with similar severity to WT SAMP (**Figure 1F**), which persists at 20-wks, but is dramatically reduced compared to WT and native SAMP (scale bar=100 $\mu$ m). \*\* $P \leq 0.01$ , \*\*\* $P \leq 0.001$ , \*\*\*\* $P \leq 0.001$ , and (#### $P \leq 0.001$  vs. 4-wk-old SAMP) by two-tailed unpaired Student's *t*-test; experiments performed at least in duplicate.

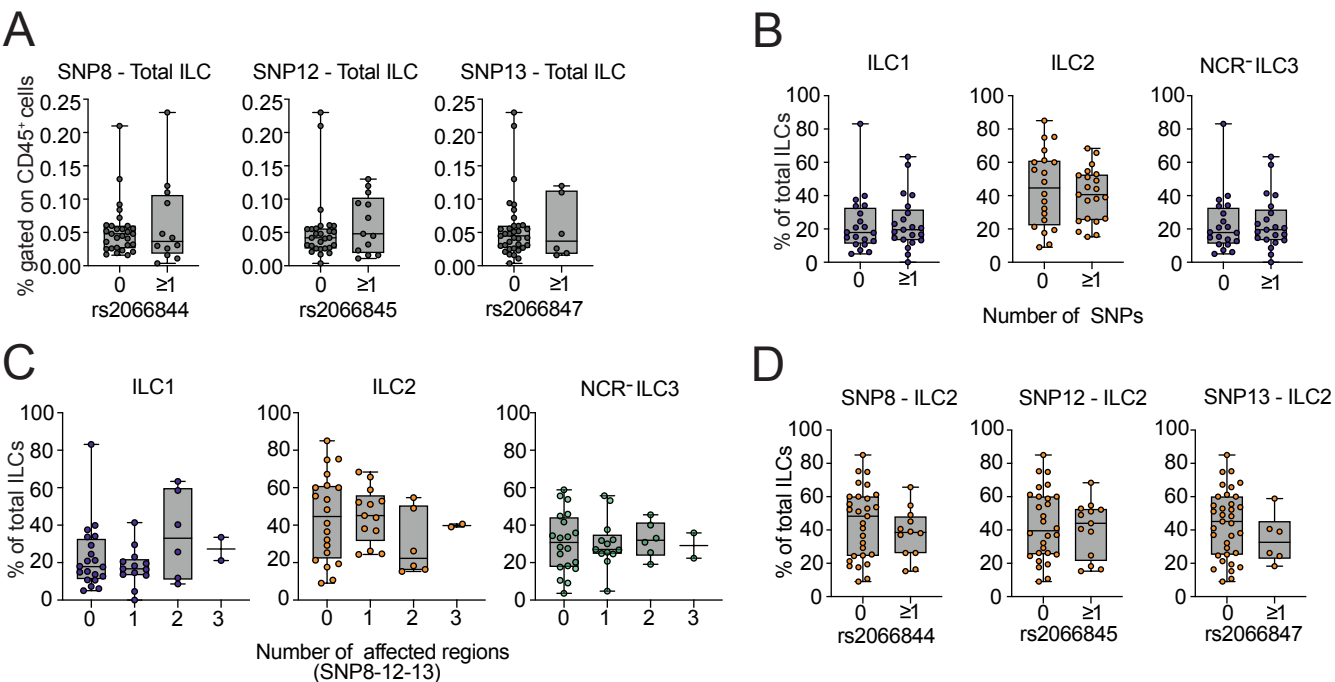

**Figure S2. Association of *NOD2* variants and ILC frequencies in Crohn's disease.**

**A)** Frequency of total ILCs (Lin<sup>-</sup>CD161<sup>+</sup>CD127<sup>+</sup>) within live CD45<sup>+</sup> population in CD patients who are carriers of one or more allele variants for either SNP8, SNP12 or SNP13 compared to non-carriers. **B)** Percentages of ILC1s (CD294<sup>-</sup>CD117<sup>-</sup>CD336<sup>-</sup>), ILC2s (CD294<sup>+</sup>), and ILC3s (CD294<sup>-</sup>CD117<sup>+</sup>CD336<sup>-</sup>) of total ILCs comparing carriers (≥1 SNP) vs. non-carriers, and **C)** broken down by number of affected regions (SNP8-12-13). **D)** Frequency of ILC2s comparing carriers vs. non-carriers of *NOD2* variant rs2066844 (SNP8), rs2066845 (SNP12), and rs2066847 (SNP13) in CD patients. Data presented as box plots (25th, 50th, 75th quantiles shown); *N*=41. No significant differences were observed between carriers (≥1) and non-carriers (0) of *NOD2* variants by unpaired nonparametric Mann-Whitney test, and among carriers of 0-1-2-3 SNPs by one-way ANOVA with Bonferroni correction.
